# Supplementary material
Source: PubMed Central journal article supplement (PMC60089)
Supplement: pnas_98_22_12538__1.pdf [file pnas_98_22_12538__1.pdf]

**Table 1.** *B. subtilis* strains used

| Strain  | Relevant genotype or characteristics                                                                                                                                                  | Source or reference <sup>§</sup> |
|---------|---------------------------------------------------------------------------------------------------------------------------------------------------------------------------------------|----------------------------------|
| BR151   | <i>trpC2 metB10 lys-3</i>                                                                                                                                                             | Lab stock                        |
| SA501   | SP $\beta$ c2 $\Delta$ 2::Tn917::P <sub>trpE</sub> - <i>sacB</i> '-' <i>lacZ sacXY<math>\Delta</math>3 licT<math>\Delta</math> sacT<math>\Delta</math>4 sacB<math>\Delta</math>23</i> | 15                               |
| SL7375  | <i>trpC2 metB10 lys-3 spoIII<math>\Delta</math>::spc</i>                                                                                                                              | 31                               |
| SL7643* | <i>sacXY<math>\Delta</math>3 licT<math>\Delta</math> sacT<math>\Delta</math>4 sacB<math>\Delta</math>23</i>                                                                           | This study                       |
| SL7721  | <i>sacXY<math>\Delta</math>3 licT<math>\Delta</math> sacT<math>\Delta</math>4 sacB<math>\Delta</math>23 amyE::P<sub>trpE</sub>-<i>sacB</i>'-'<i>lacZ</i><sup>†</sup></i>              | pZS2→SL7643                      |
| SL7723  | <i>sacXY<math>\Delta</math>3 licT<math>\Delta</math> sacT<math>\Delta</math>4 sacB<math>\Delta</math>23 amyE::P<sub>trpE</sub>-<i>sacB</i>'-'<i>lacZ</i> (pZS9)<sup>‡</sup></i>       | pZS9→SL7721                      |
| SL7724  | <i>sacXY<math>\Delta</math>3 licT<math>\Delta</math> sacT<math>\Delta</math>4 sacB<math>\Delta</math>23 amyE::P<sub>trpE</sub>-<i>sacB</i>'-'<i>lacZ</i> (pZS10)</i>                  | pZS10→SL7721                     |
| SL7732  | <i>sacXY<math>\Delta</math>3 licT<math>\Delta</math> sacT<math>\Delta</math>4 sacB<math>\Delta</math>23</i> (pZS9)                                                                    | pZS9→SL7643                      |
| SL7733  | <i>sacXY<math>\Delta</math>3 licT<math>\Delta</math> sacT<math>\Delta</math>4 sacB<math>\Delta</math>23</i> (pZS10)                                                                   | pZS10→SL7643                     |
| SL8017  | <i>sacXY<math>\Delta</math>3 licT<math>\Delta</math> sacT<math>\Delta</math>4 sacB<math>\Delta</math>23 amyE::P<sub>spoIIQ</sub>-<i>sacB</i>'-'<i>lacZ</i> (pZS9)</i>                 | pZS41→SL7732                     |
| SL8026  | <i>sacXY<math>\Delta</math>3 licT<math>\Delta</math> sacT<math>\Delta</math>4 sacB<math>\Delta</math>23 amyE::P<sub>cotE</sub>-<i>sacB</i>'-'<i>lacZ</i> (pZS9)</i>                   | pZS57→SL7732                     |
| SL8030  | <i>sacXY<math>\Delta</math>3 licT<math>\Delta</math> sacT<math>\Delta</math>4 sacB<math>\Delta</math>23 amyE::P<sub>spoIIQ</sub>-<i>sacB</i>'-'<i>lacZ</i> (pZS10)</i>                | pZS41→SL7733                     |
| SL8038  | <i>sacXY<math>\Delta</math>3 licT<math>\Delta</math> sacT<math>\Delta</math>4 sacB<math>\Delta</math>23 amyE::P<sub>cotE</sub>-<i>sacB</i>'-'<i>lacZ</i> (pZS10)</i>                  | pZS57→SL7733                     |
| SL8063  | <i>sacXY<math>\Delta</math>3 licT<math>\Delta</math> sacT<math>\Delta</math>4 sacB<math>\Delta</math>23 amyE::P<sub>spoIIQ</sub>-<i>sacB</i>'-'<i>lacZ</i></i>                        | pZS41→SL7643                     |
| SL8068  | <i>sacXY<math>\Delta</math>3 licT<math>\Delta</math> sacT<math>\Delta</math>4 sacB<math>\Delta</math>23 amyE::P<sub>cotE</sub>-<i>sacB</i>'-'<i>lacZ</i></i>                          | pZS57→SL7643                     |
| SL8213  | <i>sacXY<math>\Delta</math>3 licT<math>\Delta</math> sacT<math>\Delta</math>4 sacB<math>\Delta</math>23 amyE::P<sub>katX</sub>-<i>sacB</i>'-'<i>lacZ</i> (pZS9)</i>                   | pZS64→SL7732                     |
| SL8215  | <i>sacXY<math>\Delta</math>3 licT<math>\Delta</math> sacT<math>\Delta</math>4 sacB<math>\Delta</math>23 amyE::P<sub>katX</sub>-<i>sacB</i>'-'<i>lacZ</i> (pZS10)</i>                  | pZS64→SL7733                     |
| SL8234  | <i>sacXY<math>\Delta</math>3 licT<math>\Delta</math> sacT<math>\Delta</math>4 sacB<math>\Delta</math>23 amyE::P<sub>katX</sub>-<i>sacB</i>'-'<i>lacZ</i></i>                          | pZS64→SL7643                     |
| SL8726  | <i>sacXY<math>\Delta</math>3 licT<math>\Delta</math> sacT<math>\Delta</math>4 sacB<math>\Delta</math>23</i> (pZS106)                                                                  | pZS106→SL7643                    |
| SL8728  | <i>sacXY<math>\Delta</math>3 licT<math>\Delta</math> sacT<math>\Delta</math>4 sacB<math>\Delta</math>23</i> (pZS107)                                                                  | pZS107→SL7643                    |
| SL8730  | <i>sacXY<math>\Delta</math>3 licT<math>\Delta</math> sacT<math>\Delta</math>4 sacB<math>\Delta</math>23 amyE::P<sub>sspA</sub>-<i>sacB</i>'-'<i>lacZ</i> (pZS106)</i>                 | pZS94→SL8726                     |
| SL8731  | <i>sacXY<math>\Delta</math>3 licT<math>\Delta</math> sacT<math>\Delta</math>4 sacB<math>\Delta</math>23 amyE::P<sub>katX</sub>-<i>sacB</i>'-'<i>lacZ</i> (pZS106)</i>                 | pZS64→SL8726                     |
| SL8732  | <i>sacXY<math>\Delta</math>3 licT<math>\Delta</math> sacT<math>\Delta</math>4 sacB<math>\Delta</math>23 amyE::P<sub>sspA</sub>-<i>sacB</i>'-'<i>lacZ</i></i>                          | pZS94→SL7643                     |

|        |                                                                                           |               |
|--------|-------------------------------------------------------------------------------------------|---------------|
| SL8733 | <i>sacXYΔ3 licTΔ sacTΔ4 sacBΔ23 amyE::P<sub>sspE</sub>-sacB'</i> - <i>lacZ</i> (pZS107)   | pZS95→SL8728  |
| SL8734 | <i>sacXYΔ3 licTΔ sacTΔ4 sacBΔ23 amyE::P<sub>katX</sub>-sacB'</i> - <i>lacZ</i> (pZS107)   | pZS64→SL8728  |
| SL8735 | <i>sacXYΔ3 licTΔ sacTΔ4 sacBΔ23 amyE::P<sub>sspE</sub>-sacB'</i> - <i>lacZ</i>            | pZS95→SL7643  |
| SL8826 | <i>sacXYΔ3 licTΔ sacTΔ4 sacBΔ23 amyE::P<sub>spolIQ</sub>-sacB'</i> - <i>lacZ</i> (pZS9)   |               |
|        | <i>spoIII E::spc</i>                                                                      | SL7375→SL8017 |
| SL8827 | <i>sacXYΔ3 licTΔ sacTΔ4 sacBΔ23 amyE::P<sub>cotE</sub>-sacB'</i> - <i>lacZ</i> (pZS9)     |               |
|        | <i>spoIII E::spc</i>                                                                      | SL7375→SL8026 |
| SL8828 | <i>sacXYΔ3 licTΔ sacTΔ4 sacBΔ23 amyE::P<sub>spolIQ</sub>-sacB'</i> - <i>lacZ</i> (pZS10)  |               |
|        | <i>spoIII E::spc</i>                                                                      | SL7375→SL8030 |
| SL8829 | <i>sacXYΔ3 licTΔ sacTΔ4 sacBΔ23 amyE::P<sub>cotE</sub>-sacB'</i> - <i>lacZ</i> (pZS10)    |               |
|        | <i>spoIII E::spc</i>                                                                      | SL7375→SL8038 |
| SL8830 | <i>sacXYΔ3 licTΔ sacTΔ4 sacBΔ23 amyE::P<sub>spolIQ</sub>-sacB'</i> - <i>lacZ</i>          |               |
|        | <i>spoIII E::spc</i>                                                                      | SL7375→SL8063 |
| SL8831 | <i>sacXYΔ3 licTΔ sacTΔ4 sacBΔ23 amyE::P<sub>cotE</sub>-sacB'</i> - <i>lacZ</i>            |               |
|        | <i>spoIII E::spc</i>                                                                      | SL7375→SL8068 |
| SL8832 | <i>sacXYΔ3 licTΔ sacTΔ4 sacBΔ23 amyE::P<sub>spolIQ</sub>-sacB'</i> - <i>lacZ</i> (pZS106) | pZS41→SL8726  |
| SL8833 | <i>sacXYΔ3 licTΔ sacTΔ4 sacBΔ23 amyE::P<sub>spolIQ</sub>-sacB'</i> - <i>lacZ</i> (pZS107) | pZS41→SL8828  |
| SL8965 | <i>sacXYΔ3 licTΔ sacTΔ4 sacBΔ23 amyE::P<sub>trpE</sub>-sacB'</i> - <i>lacZ</i> (pZS106)   | pZS2→SL8726   |
| SL8967 | <i>sacXYΔ3 licTΔ sacTΔ4 sacBΔ23 amyE::P<sub>trpE</sub>-sacB'</i> - <i>lacZ</i> (pZS107)   | pZS2→SL8728   |
| SL8974 | <i>sacXYΔ3 licTΔ sacTΔ4 sacBΔ23 amyE::P<sub>sspA</sub>-sacB'</i> - <i>lacZ</i> (pZS9)     | pZS94→SL7732  |
| SL8976 | <i>sacXYΔ3 licTΔ sacTΔ4 sacBΔ23 amyE::P<sub>sspE</sub>-sacB'</i> - <i>lacZ</i> (pZS9)     | pZS95→SL7732  |
| SL9101 | <i>sacXYΔ3 licTΔ sacTΔ4 sacBΔ23</i> (pZS123)                                              | pZS123→SL7643 |
| SL9121 | <i>sacXYΔ3 licTΔ sacTΔ4 sacBΔ23 amyE::P<sub>gerE</sub>-sacB'</i> - <i>lacZ</i>            | pZS120→SL7643 |
| SL9129 | <i>sacXYΔ3 licTΔ sacTΔ4 sacBΔ23 amyE::P<sub>trpE</sub>-sacB'</i> - <i>lacZ</i> (pZS123)   | pZS2→SL9101   |
| SL9155 | <i>sacXYΔ3 licTΔ sacTΔ4 sacBΔ23 amyE::P<sub>gerE</sub>-sacB'</i> - <i>lacZ</i> (pZS123)   | pZS120→SL9101 |
| SL9157 | <i>sacXYΔ3 licTΔ sacTΔ4 sacBΔ23 amyE::P<sub>cotE</sub>-sacB'</i> - <i>lacZ</i> (pZS123)   | pZS57→SL9101  |
| SL9159 | <i>sacXYΔ3 licTΔ sacTΔ4 sacBΔ23 amyE::P<sub>gerE</sub>-sacB'</i> - <i>lacZ</i> (pZS10)    | pZS120→SL7733 |

|        |                                                                                   |               |
|--------|-----------------------------------------------------------------------------------|---------------|
| SL9418 | <i>sacXYΔ3 licTΔ sacTΔ4 sacBΔ23 amyE::P<sub>comK</sub>-sacB'</i> - 'lacZ          | pZS127→SL7643 |
| SL9420 | <i>sacXYΔ3 licTΔ sacTΔ4 sacBΔ23 amyE::P<sub>srfA</sub>-sacB'</i> - 'lacZ          | pZS128→SL7643 |
| SL9422 | <i>sacXYΔ3 licTΔ sacTΔ4 sacBΔ23 amyE::P<sub>comG</sub>-sacB'</i> - 'lacZ          | pZS129→SL7643 |
| SL9450 | <i>sacXYΔ3 licTΔ sacTΔ4 sacBΔ23 amyE::P<sub>srfA</sub>-sacB'</i> - 'lacZ(pZS136)  | pZS136→SL9420 |
| SL9452 | <i>sacXYΔ3 licTΔ sacTΔ4 sacBΔ23 amyE::P<sub>srfA</sub>-sacB'</i> - 'lacZ (pZS135) | pZS135→SL9420 |
| SL9454 | <i>sacXYΔ3 licTΔ sacTΔ4 sacBΔ23 amyE::P<sub>srfA</sub>-sacB'</i> - 'lacZ (pZS137) | pZS137→SL9420 |
| SL9456 | <i>sacXYΔ3 licTΔ sacTΔ4 sacBΔ23 amyE::P<sub>comK</sub>-sacB'</i> - 'lacZ (pZS136) | pZS136→SL9418 |
| SL9458 | <i>sacXYΔ3 licTΔ sacTΔ4 sacBΔ23 amyE::P<sub>comK</sub>-sacB'</i> - 'lacZ (pZS135) | pZS135→SL9418 |
| SL9460 | <i>sacXYΔ3 licTΔ sacTΔ4 sacBΔ23 amyE::P<sub>comK</sub>-sacB'</i> - 'lacZ (pZS137) | pZS137→SL9418 |
| SL9462 | <i>sacXYΔ3 licTΔ sacTΔ4 sacBΔ23 amyE::P<sub>comG</sub>-sacB'</i> - 'lacZ (pZS136) | pZS136→SL9422 |
| SL9464 | <i>sacXYΔ3 licTΔ sacTΔ4 sacBΔ23 amyE::P<sub>comG</sub>-sacB'</i> - 'lacZ (pZS135) | pZS135→SL9422 |
| SL9466 | <i>sacXYΔ3 licTΔ sacTΔ4 sacBΔ23 amyE::P<sub>comG</sub>-sacB'</i> - 'lacZ (pZS137) | pZS137→SL9422 |

---

\* SL7643 was a derivative of SA501 cured of the prophage SPβ::Tn917::P<sub>trpE</sub>-sacB' - 'lacZ.

† The *sacB'* - 'lacZ translational fusions under the control of various promoters present in plasmids were integrated into *amyE* site by double crossover.

‡ *Supporting Information* gives a description of plasmid constructions.

§ Arrow points from donor DNA source towards recipient strain used in transformation cross.
