# Supplementary material
Source: PubMed Central journal article supplement (PMC60089)
Supplement: pnas_98_22_12538__3.pdf [file pnas_98_22_12538__3.pdf]

**Table 2.** Location of  $\beta$ -galactosidase expressed from the *sacB'*-*lacZ* fusion subject to different transcriptional controls

| Strain | Controlling $\sigma$ factor* | Organisms showing the indicated staining pattern <sup>§</sup> |                  |            |                 |
|--------|------------------------------|---------------------------------------------------------------|------------------|------------|-----------------|
|        |                              | Prespore                                                      | Mother cell      | Whole cell | No fluorescence |
| SL8017 | $\sigma^F/\sigma^F$          | 210 <sup>†</sup>                                              | 0                | 0          | 382             |
| SL8213 | $\sigma^F/\sigma^F$          | 207 <sup>†</sup>                                              | 0                | 0          | 465             |
| SL8038 | $\sigma^E/\sigma^E$          | 0                                                             | 142 <sup>‡</sup> | 3          | 359             |
| SL8030 | $\sigma^F/\sigma^E$          | 0                                                             | 0                | 0          | 506             |
| SL8026 | $\sigma^E/\sigma^F$          | 0                                                             | 0                | 0          | 508             |
| SL8730 | $\sigma^G/\sigma^G$          | 139 <sup>†</sup>                                              | 1                | 0          | 382             |
| SL8733 | $\sigma^G/\sigma^G$          | 106 <sup>†</sup>                                              | 1                | 0          | 418             |
| SL8731 | $\sigma^F/\sigma^G$          | 0                                                             | 0                | 0          | 505             |
| SL8832 | $\sigma^F/\sigma^G$          | 0                                                             | 0                | 0          | 511             |
| SL9155 | $\sigma^K/\sigma^K$          | 1                                                             | 187 <sup>‡</sup> | 2          | 459             |
| SL9157 | $\sigma^E/\sigma^K$          | 0                                                             | 0                | 0          | 450             |

\* The first  $\sigma$  factor directs transcription of *sacB'*-*lacZ* and the second transcription of *sacY*(1-55).

<sup>†</sup> With strains SL8730 and SL8733, expression was detected only in postengulfment prespores. With strains SL8017 and SL8213, expression was detected in the pre- and postengulfment prespores.

<sup>‡</sup> With strain SL9155, expression was detected only in postengulfment mother cells. With strain SL8038, expression was detected in the pre- and postengulfment mother cells.

<sup>§</sup> Samples were taken at T3 for SL8017 and SL8213, in which the *sacB'*-*lacZ* fusions are under the control of a promoter directed by  $\sigma^F$ ; at T3.5 for SL8038, in which the *sacB'*-*lacZ* fusion is under the control of a promoter directed by  $\sigma^E$ ; and at T6 – T7 for SL8730, SL8733, and SL9155, in which the *sacB'*-*lacZ* fusions are under the control of a promoter directed by  $\sigma^G$  or  $\sigma^K$ .
